# Supplementary material for: Effect of Drying Methods on Bioactive Compounds and Antioxidant Capacity in Grape Skin Residues from the New Hybrid Variety “BRS Magna”
Source: PubMed Central journal article supplement (PMC7466153; doi:10.3390/molecules25163701), 2020-08-14
Supplement: molecules-25-03701-s001.pdf [file molecules-25-03701-s001.pdf]

*Supplementary Materials*

# **Effect of Drying Methods on Bioactive Compounds and Antioxidant Capacity in Grape Skin Residues from the New Hybrid Variety “BRS Magna”**

**Gabriela Viana da Silva <sup>1</sup>, Bruna Aparecida Souza Machado <sup>2</sup>, Walkia Polliana de Oliveira <sup>1</sup>, Camilla Fernanda Godinho da Silva <sup>1</sup>, Cedenir Pereira de Quadros <sup>3</sup>, Janice Izabel Druzian <sup>1</sup>, Ederlan de Souza Ferreira <sup>1,\*</sup> and Marcelo Andrés Umsza-Guez <sup>4,\*</sup>**

<sup>1</sup> School of Pharmacy, Federal University of Bahia (UFBA), Salvador 40170-115, Bahia, Brazil; gvstecnologa@yahoo.com (G.V.d.S.); walkia2010@hotmail.com (W.P.d.O.); camillagodinho@gmail.com (C.F.G.d.S.); janicedruzian@hotmail.com (J.I.D.)

<sup>2</sup> Technology College, National Service for Industrial Learning (SENAI/CIMATEC), Salvador 41650-010, Bahia, Brazil; brunam@fieb.org.br

<sup>3</sup> School of Pharmacy, Federal University of the São Francisco Valley (UNIVASF), Petrolina 56300-000, Pernambuco, Brazil; cedenir.quadros@univasf.edu.br

<sup>4</sup> Department of Biotechnology, Health Science Institute, Federal University of Bahia (UFBA), Salvador 40170-115, Bahia, Brazil; marcelo.umsza@ufba.br (M.A.U.-G.)

\* Correspondence: ederlan.ferreira@ufba.br (E.d.S.F.); marcelo.umsza@ufba.br (M.A.U.-G.); Tel.: +55-71-99231-3184(E.d.S.F.); Tel.: +55-71-99285-9330 (M.A.U.-G.)

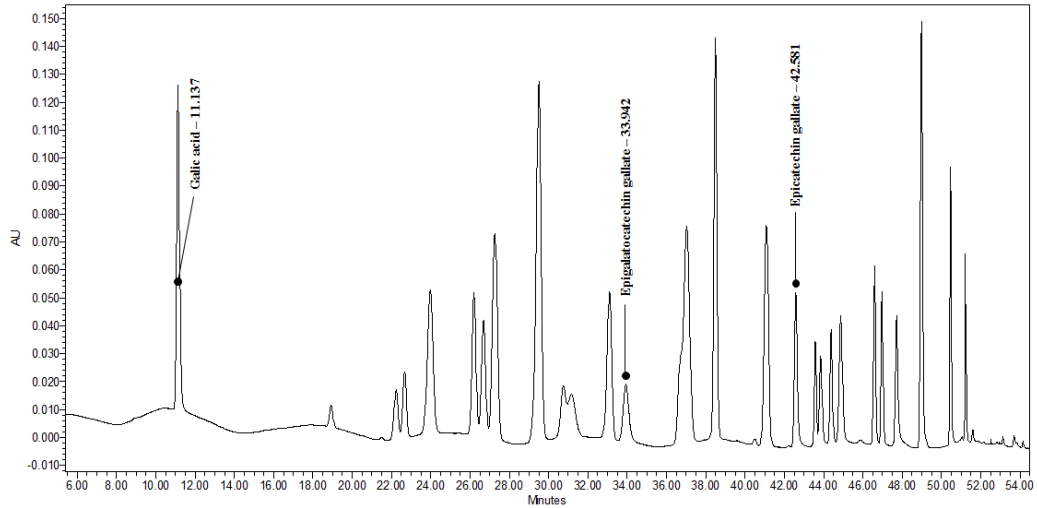

| Compound                     | Retention time (min) | Equation               | R <sup>2</sup> |
|------------------------------|----------------------|------------------------|----------------|
| Gallic acid                  | 11.137               | $y = 173091x + 10779$  | 0.9987         |
| (-)-Epicatechin gallate      | 42.581               | $y = 122591x - 2556.5$ | 0.9962         |
| (-)-Epigallocatechin gallate | 33.942               | $y = 132703x - 5981.3$ | 0.9993         |

(a)

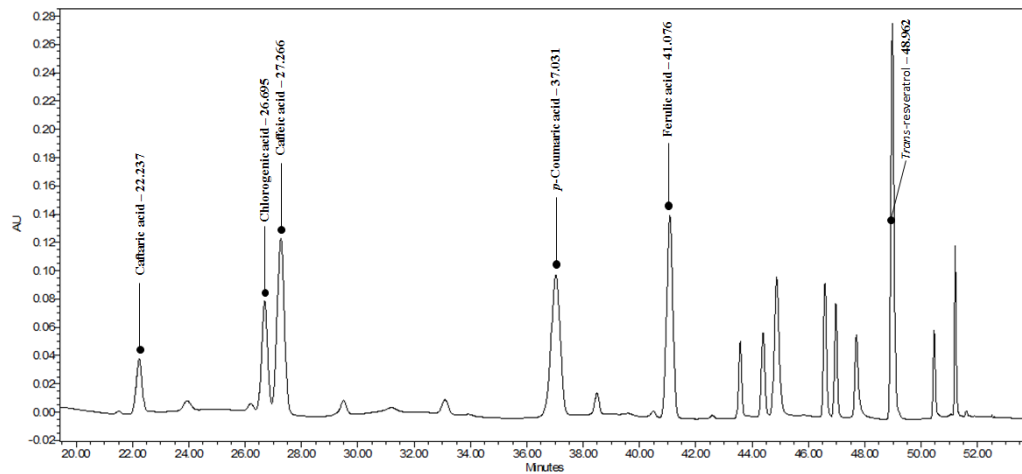

| Compound                  | Retention time (min) | Equation              | R <sup>2</sup> |
|---------------------------|----------------------|-----------------------|----------------|
| <i>Trans</i> -resveratrol | 48.962               | $y = 147196x + 12633$ | 0.9991         |
| Caffeic acid              | 27.266               | $y = 121831x + 26031$ | 0.9988         |
| Caftaric acid             | 22.237               | $y = 113729x + 15360$ | 0.9993         |
| Ferulic acid              | 41.076               | $y = 58132x + 9098$   | 0.9978         |
| Chlorogenic acid          | 26.695               | $y = 65252x + 27046$  | 0.9986         |
| <i>p</i> -Coumaric acid   | 37.031               | $y = 137748x + 25549$ | 0.9999         |

(b)

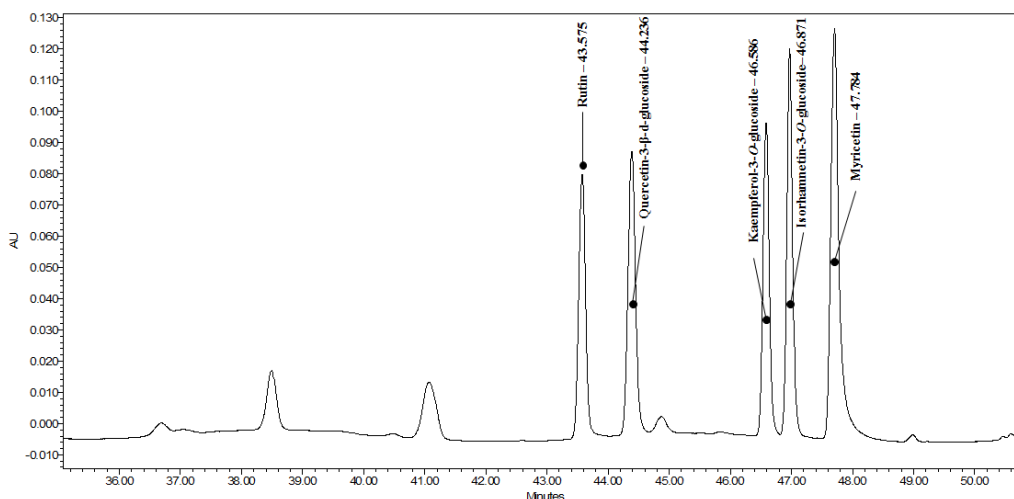

| Compound                   | Retention time (min) | Equation              | R <sup>2</sup> |
|----------------------------|----------------------|-----------------------|----------------|
| Kaempferol-3-O-glucoside   | 46.582               | $y = 25426x + 1397.2$ | 0.9987         |
| Myricetin                  | 47.784               | $y = 75965x + 1050.5$ | 0.9992         |
| Isorhamnetin-3-O-glucoside | 46.871               | $y = 43690x + 2006.7$ | 0.9988         |
| Rutin                      | 43.575               | $y = 40716x + 1009.7$ | 0.9998         |
| Quercetin-3-β-d-glucoside  | 44.236               | $y = 83734x + 2500.1$ | 0.9996         |

(c)

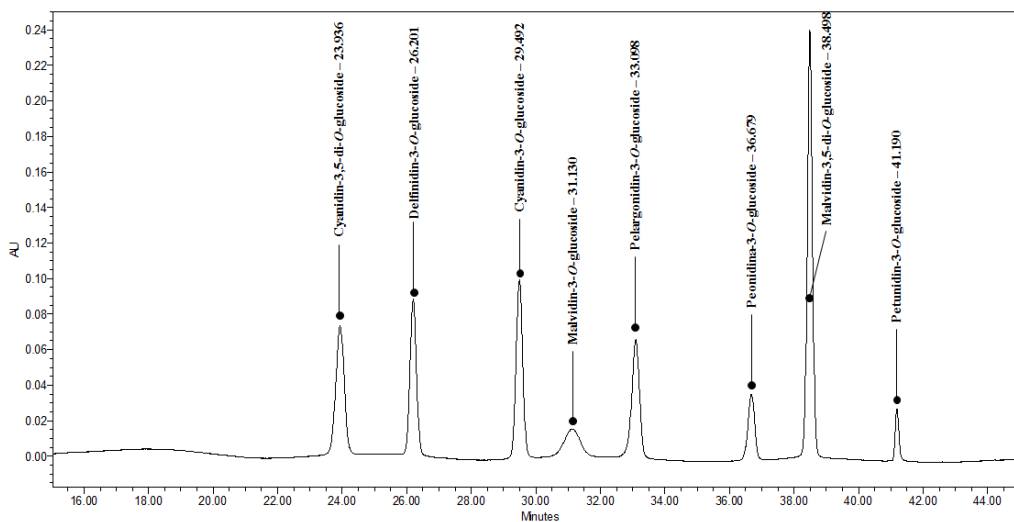

| Compound                    | Retention time (min) | Equation              | R <sup>2</sup> |
|-----------------------------|----------------------|-----------------------|----------------|
| Cyanidin-3,5-di-O-glucoside | 23.936               | $y = 22844x + 10748$  | 0.9984         |
| Malvidin-3,5-di-O-glucoside | 38.498               | $y = 42295x + 16847$  | 0.9990         |
| Pelargonidin-3-O-glucoside  | 33.098               | $y = 55444x + 5843.9$ | 0.9995         |
| Delphinidin-3-O-glucoside   | 26.201               | $y = 37747x + 17541$  | 0.9990         |
| Cyanidin-3-O-glucoside      | 29.492               | $y = 45405x + 16107$  | 0.9984         |
| Malvidin-3-O-glucoside      | 31.130               | $y = 55142x + 9098$   | 0.9976         |
| Peonidin-3-O-glucoside      | 36.679               | $y = 67001x + 2076.4$ | 0.9976         |
| Petunidin-3-O-glucoside     | 41.190               | $y = 55444x + 5843.9$ | 0.9995         |

(d)

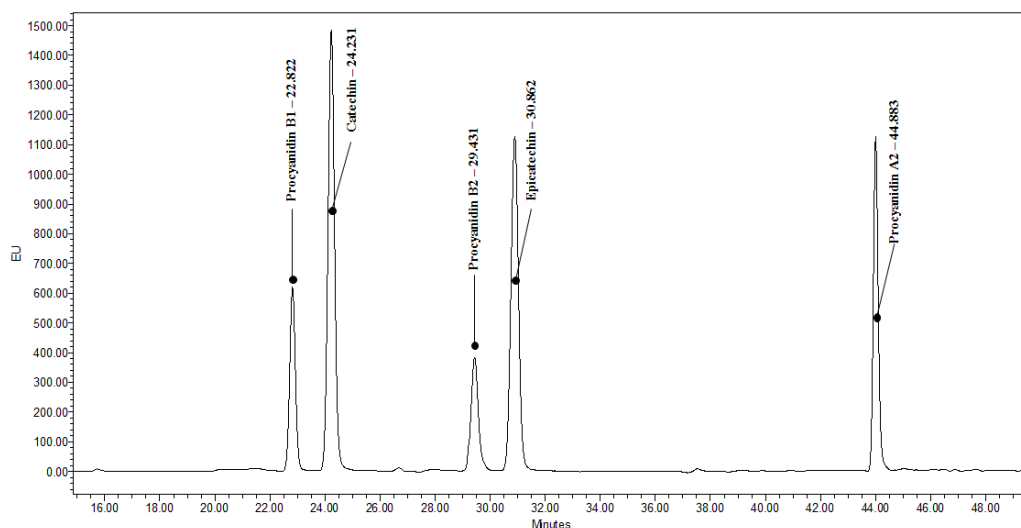

| Compound        | Retention time (min) | Equation                           | R <sup>2</sup> |
|-----------------|----------------------|------------------------------------|----------------|
| (-)-Epicatechin | 30.862               | $y = 122591x - 2556.5$             | 0.9962         |
| (+)-Catechin    | 24.231               | $y = 1 \times 107x + 6 \times 106$ | 0.9887         |
| Procyanidin A2  | 44.883               | $y = 8 \times 106x + 2 \times 106$ | 0.9901         |
| Procyanidin B1  | 22.822               | $y = 8 \times 106x + 2 \times 106$ | 0.9901         |
| Procyanidin B2  | 29.431               | $y = 7 \times 106x + 4 \times 106$ | 0.9839         |

(e)

**Figure S1:** Chromatograms of the phenolic compounds and their respective retention time (RT), equation and regression coefficient (R<sup>2</sup>). To identify and quantify the compounds were used DAD in the wavelengths 280 (a), 320 (b), 360 (c), 520 nm (d), and fluorescence at 280 nm excitation and 320 nm emission (e).
